# Supplementary material
Source: publisher figshare collection journal article supplement (https://sage.figshare.com/ndownloader/files/17534942)
Supplement: Supplementary file 1 [file 17534942]

Table S1. Associations between specific dimensions of parenting and self-control for cross-sectional and longitudinal effect sizes

| Specific parenting dimensions           | #ES | ES <sub>z</sub> | SE   | t      | 95% CI(ES <sub>z</sub> ) | p     | r    | 95% CI (r)    |
|-----------------------------------------|-----|-----------------|------|--------|--------------------------|-------|------|---------------|
| <i>Cross-sectional associations</i>     |     |                 |      |        |                          |       |      |               |
| Authoritative                           | 66  | .183            | .025 | 7.227  | [.133, .233]             | <.001 | .181 | [.132, .229]  |
| Monitoring                              | 69  | .180            | .019 | 9.434  | [.143, .218]             | <.001 | .178 | [.142, .215]  |
| Support                                 | 98  | .243            | .018 | 13.416 | [.208, .279]             | <.001 | .238 | [.205, .272]  |
| Responsive discipline                   | 36  | .255            | .026 | 9.895  | [.204, .306]             | <.001 | .250 | [.201, .297]  |
| Warmth                                  | 50  | .210            | .023 | 9.141  | [.165, .255]             | <.001 | .207 | [.164, .250]  |
| Supervision                             | 16  | .180            | .036 | 4.997  | [.109, .250]             | <.001 | .178 | [.109, .245]  |
| Positive expressivity                   | 7   | .217            | .059 | 3.679  | [.101, .333]             | <.001 | .214 | [.101, .321]  |
| Conflict                                | 50  | .234            | .028 | 8.453  | [.180, .289]             | <.001 | .230 | [.178, .281]  |
| Authoritarian                           | 55  | .185            | .027 | 6.931  | [.133, .238]             | <.001 | .183 | [.132, .234]  |
| Negative control                        | 66  | .157            | .021 | 7.501  | [.116, .198]             | <.001 | .156 | [.115, .195]  |
| Harshness                               | 30  | .106            | .030 | 3.508  | [.047, .165]             | <.001 | .106 | [.047, .164]  |
| Permissive                              | 32  | .151            | .028 | 5.310  | [.095, .207]             | <.001 | .150 | [.095, .204]  |
| Attachment                              | 64  | .221            | .026 | 9.355  | [.190, .291]             | <.001 | .217 | [.188, .283]  |
| Relationship                            | 31  | .273            | .029 | 9.355  | [.216, .330]             | <.001 | .266 | [.213, .319]  |
| <i>Longitudinal associations P → SC</i> |     |                 |      |        |                          |       |      |               |
| Authoritative                           | 36  | .161            | .029 | 5.617  | [.105, .217]             | <.001 | .160 | [.105, .214]  |
| Monitoring                              | 27  | .186            | .031 | 6.017  | [.125, .246]             | <.001 | .183 | [.124, .241]  |
| Support                                 | 24  | .083            | .033 | 2.543  | [.019, .147]             | .012  | .083 | [.019, .146]  |
| Responsive discipline                   | 34  | .218            | .025 | 8.631  | [.168, .268]             | <.001 | .215 | [.166, .262]  |
| Warmth                                  | 17  | .164            | .038 | 4.359  | [.090, .238]             | <.001 | .163 | [.090, .234]  |
| Supervision                             | 22  | .148            | .033 | 4.531  | [.084, .213]             | <.001 | .147 | [.084, .210]  |
| Positive expressivity                   | 9   | .097            | .055 | 1.771  | [-.011, .205]            | .078  | .100 | [-.011, .202] |
| Conflict                                | 35  | .060            | .081 | 0.743  | [-.099, .219]            | .458  | .060 | [-.099, .216] |
| Authoritarian                           | 20  | .200            | .041 | 4.842  | [.118, .281]             | <.001 | .197 | [.117, .274]  |

|                                         |    |      |      |       |               |       |      |               |
|-----------------------------------------|----|------|------|-------|---------------|-------|------|---------------|
| Negative control                        | 6  | .124 | .041 | 3.031 | [.043, .204]  | .003  | .123 | [.043, .201]  |
| Harshness                               | 26 | .107 | .032 | 3.292 | [.043, .171]  | .001  | .107 | [.043, .169]  |
| Permissive                              | 6  | .130 | .044 | 2.926 | [.043, .218]  | .004  | .130 | [.043, .215]  |
| Attachment                              | 27 | .156 | .030 | 5.214 | [.097, .215]  | <.001 | .154 | [.097, .212]  |
| Relationship                            | 9  | .264 | .035 | 7.546 | [.195, .333]  | <.001 | .258 | [.193, .321]  |
| <i>Longitudinal associations SC → P</i> |    |      |      |       |               |       |      |               |
| Authoritative                           | 37 | .189 | .035 | 5.417 | [.120, .258]  | <.001 | .187 | [.119, .252]  |
| Monitoring                              | 41 | .131 | .034 | 3.800 | [.063, .199]  | <.001 | .130 | [.063, .196]  |
| Support                                 | 11 | .247 | .048 | 5.173 | [.153, .341]  | <.001 | .242 | [.152, .328]  |
| Responsive discipline                   | 25 | .288 | .036 | 8.053 | [.217, .358]  | <.001 | .280 | [.214, .343]  |
| Warmth                                  | 14 | .143 | .070 | 2.051 | [.006, .280]  | .041  | .142 | [.006, .273]  |
| Supervision                             | 15 | .192 | .055 | 3.484 | [.083, .300]  | <.001 | .190 | [.083, .291]  |
| Positive expressivity                   | 9  | .135 | .077 | 1.747 | [-.017, .287] | .082  | .134 | [-.017, .279] |
| Conflict                                | 32 | .191 | .129 | 1.475 | [-.064, .446] | .141  | .189 | [-.064, .419] |
| Authoritarian                           | 22 | .247 | .037 | 6.715 | [.174, .319]  | <.001 | .242 | [.172, .309]  |
| Negative control                        | 9  | .180 | .039 | 4.597 | [.103, .258]  | <.001 | .178 | [.103, .252]  |
| Harshness                               | 22 | .010 | .044 | .218  | [-.077, .097] | .828  | .010 | [-.077, .097] |
| Permissive                              | 6  | .235 | .043 | 5.512 | [.151, .320]  | <.001 | .231 | [.150, .310]  |
| Attachment                              | 17 | .180 | .053 | 3.412 | [.076, .284]  | <.001 | .178 | [.076, .277]  |
| Relationship                            | 7  | .299 | .046 | 6.510 | [.209, .390]  | <.001 | .290 | [.206, .371]  |

*Note:* P = parenting; SC = self-control. Only parenting dimensions with no less than 5 effect sizes in all the three categories are included to assure statistical power. To ensure similar direction of effects, effect sizes were recoded if 1) parenting pertained to negative dimensions, and 2) self-control was measured using a scale of ‘lack of self-control’, or ‘low self-control’. As such, for the negative parenting dimensions correlations appear positive, but reflect a negative correlation between negative parenting and self-control. The 95% CI ( $r$ ) was calculated using fisher-z-to-r formula based on lower and upper bound of the 95% CI ( $ES_z$ ).
